# Supplementary material for: Temperature-Related Reaction Norms of Gene Expression: Regulatory Architecture and Functional Implications
Source: Mol Biol Evol. 2015 May 14;32(9):2393–402. doi: 10.1093/molbev/msv120 (PMC4540970; doi:10.1093/molbev/msv120)
Supplement: Supplementary Data [file supp_msv120_Chen_Suppl.pdf]

## Supplementary

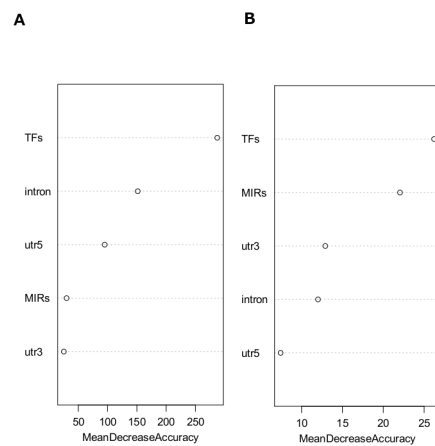

**Figure S1** Dot chart of variable importance as measured by a random forest analyses (A) classification of direction (B) classification of curvature

**Table S1.** Mean number of read pairs mapped across three replicates are given for in F1<sub>A</sub> and F1<sub>B</sub> at four temperatures

| Temperature     |                           | 13°C       | 18°C       | 23°C       | 29°C       |
|-----------------|---------------------------|------------|------------|------------|------------|
| F1 <sub>A</sub> | #raw reads                | 43,672,116 | 40,889,194 | 41,640,367 | 45,117,839 |
|                 | #reads mapped             | 29,878,137 | 30,093,347 | 31,965,901 | 37,138,250 |
|                 | #reads mapped to features | 23,532,169 | 24,828,558 | 27,181,009 | 32,809,422 |
| F1 <sub>B</sub> | #raw reads                | 42,796,478 | 42,474,298 | 42,725,914 | 43,042,101 |
|                 | #reads mapped             | 29,879,783 | 31,433,611 | 33,216,419 | 35,892,684 |
|                 | #reads mapped to features | 23,971,573 | 25,739,283 | 28,357,561 | 32,057,227 |

**Dataset S1** Reaction norm coefficients and classification of all expressed genes across temperatures

**Dataset S2** Enriched GO categories for groups of genes classified based on expression curvatures or directions.
